# Supplementary material
Source: HighWire-hosted journal article supplement (https://bjo.bmj.com/content/102/2/220)
Supplement: inline-supplementary-material-1 [file inline-supplementary-material-1.pdf]

sources of Chinese ophthalmological data in GBD 2015

1. Zhang SY, Zou LH, Gao YQ, Di Y, Wang XD. National epidemiological survey of blindness and low vision in China. *Chin Med J (Engl)* 1992;105:603-608
2. Zhao J, Jia L, Sui R, Ellwein LB. Prevalence of blindness and cataract surgery in Shunyi Country, China. *Am J Ophthalmol* 1998;126:506-514
3. Li S, Xu J, He M, et al. A Survey of Blindness and Cataract Surgery in Doumen County, China. *Ophthalmology* 1999;106:1602-1608
4. Gilbert CE, Ellwein LB. Prevalence and causes of functional low vision in school-age children: Results from standardized population surveys in Asia, Africa, and Latin America. *Invest Ophthalmol Vis Sci* 2008;49:877-881
5. Dunzhu S, Wang FS, Courtright P, et al. Blindness and eye diseases in Tibet: findings from a randomised, population based survey. *Br J Ophthalmol* 2004;87:1443-1448
6. Lu Q, Zheng Y, Sun B, et al. A population-based study of visual impairment among pre-school children in Beijing: the Beijing study of visual impairment in children. *Am J Ophthalmol* 2009;147:1075-1081
7. He M, Huang W, Zheng Y, et al. Refractive Error and Visual Impairment in School Children in Rural Southern China. *Ophthalmology* 2007;114: 374-382
8. Congdon N, Wang Y, Song Y, et al. Visual Disability, Visual Function, and Myopia among Rural Chinese Secondary School Children: The Xichang Pediatric Refractive Error Study Report. *Invest Ophthalmol Vis Sci* 2008;49:2888-2894
9. Xiao B, Kuper H, Guan C, Bailey K, Limburg H. Rapid assessment of avoidable blindness in three counties, Jiangxi Province, China. *Br J Ophthalmol* 2010;94: 1437-1442
10. Song W, Sun X, Shao Z, et al. Prevalence and causes of visual impairment in a rural North-east China adult population: a population-based survey in Bin County, Harbin. *Acta Ophthalmol* 2010;88:669-685
11. Liang YB, Friedman DS, Wong TY, et al.(2008). Prevalence and Causes of Low Vision and Blindness in a Rural Chinese Adult Population: The Handan Eye Study. *Ophthalmology* 115:1965-1972
12. Li Z, Cui H, Liu P, Zhang L, Yang H, Zhang L. Prevalence and causes of blindness and visual impairment among the elderly in rural southern Harbin, China. *Ophthalmic Epidemiol* 2008;15:334-338
13. Zhao J, Ellwein LB, Cui H, et al. Prevalence of Vision Impairment in Older Adults in Rural China:: The China Nine-Province Survey. *Ophthalmology* 2010;117: 409-416
14. Xiao B, Fan J, Deng Y, Ding Y, Muhit M, Kuper H. Using key informant method to assess the prevalence and causes of childhood blindness in Xiu'shui County, Jiangxi Province, Southeast China. *Ophthalmic Epidemiol* 2011;18:30-35
15. China - Lvliang County Rapid Assessment for Avoidable Blindness 2008 as it appears in Bourne R, Global Burden of Disease Vision Loss Expert Group. Vision Loss Database - Survey Data on Vision Loss by Severity and Etiology. [Unpublished]
16. China - Shangdu County Rapid Assessment for Avoidable Blindness 2008 as it appears in Bourne R, Global Burden of Disease Vision Loss Expert Group. Vision Loss Database - Survey Data on Vision Loss by Severity and Etiology. [Unpublished]
17. China - Tuoketuo County Rapid Assessment for Avoidable Blindness 2008 as it

- appears in Bourne R, Global Burden of Disease Vision Loss Expert Group. Vision Loss Database - Survey Data on Vision Loss by Severity and Etiology. [Unpublished]
18. China - Mianning County Rapid Assessment for Avoidable Blindness 2008 as it appears in Bourne R, Global Burden of Disease Vision Loss Expert Group. Vision Loss Database - Survey Data on Vision Loss by Severity and Etiology. [Unpublished]
  19. China - Dechang County Rapid Assessment for Avoidable Blindness 2008 as it appears in Bourne R, Global Burden of Disease Vision Loss Expert Group. Vision Loss Database - Survey Data on Vision Loss by Severity and Etiology. [Unpublished]
  20. Michon JJ, Lau J, Chan WS, Ellwein LB. Prevalence of visual impairment, blindness, and cataract surgery in the Hong Kong elderly. *Br J Ophthalmol* 2002;86:133-139
  21. Lu H, Guan H, Dai Z, et al. Prevalence of blindness and moderate and severe visual impairment among adults aged 50 years or above in Qigong City of Jiangsu Province: the China nine-province survey. *Chin J Ophthalmology* 2012;48:205-210
  22. Wei M, Chen H, Fan Y, Pathai S. Prevalence and causes of visual impairment and blindness in Sichuan province of China. *Int J Ophthalmol* 2010;3:83-89
  23. Zhou J, Yuan Y, Zhang X, Guan HJ. A prevalence investigation of blindness and low vision in 2008 among adults aged 60 years or above in 2 villages of Nantong. *Zhonghua Yan Ke Za Zhi* 2012;48:908-914
  24. Li J, Zhong H, Cai N, et al. The prevalence and causes of visual impairment in an elderly Chinese Bai ethnic rural population. The Yunnan Minority Eye Study. *Invest Ophthalmol Vis Sci* 2012;53: 4498-4508
  25. Zhu M, Tong X, Zhao R, et al. Visual impairment and spectacle coverage rate in Baoshan district, China: population-based study. *BMC Public Health* 2013;13: 311-324
  26. Zhang Y, Wang H, Liu J, et al. Prevalence of blindness and low vision: a study in the rural Heilongjiang Province of China. *Clinical and experimental ophthalmology* 2012;40:484-489
  27. Wang L, Huang W, He M. Causes and five year incidence of blindness and visual impairment in urban southern China: the Liwan eye study. *Invest Ophthalmol Vis Sci* 2013;54:4117-4121
  28. Yao Y, Shao J, Sun W, et al. Prevalence of blindness and causes of visual impairment among adults aged 50 years or above in southern Jiangsu Province of China. *Pak J Med Sci* 2013;29:1203-1207
  29. Guo Y, Liu LJ, Xu L, et al. Visual impairment and spectacle use in schoolchildren in rural and urban regions in Beijing. *Eur J Ophthalmol* 2014;24:258-265
  30. Mai DN, Xie TY, Chen XY, Mi NA, Fu J. Survey of blindness and low vision among residents in Shuimogou District, Urumqi, China in 2010. *Zhong hua Yi Xue Za Zhi* 2012;92:743-747
  31. Li EY, Liu Y, Zhan X, et al. Prevalence of Blindness and Outcomes of Cataract Surgery in Hainan Province in South China. *Ophthalmology* 2013;120:2176-2186
  32. Li X, Zhou Q, Sun L, et al. Prevalence of blindness and low vision in a rural population in Northern China: Preliminary results from a population-based survey. *Ophthalmic Epidemiology* 2012;19:272-277
  33. Li L, Guan H, Xun P, Zhou J, Gu H. Prevalence and causes of visual impairment among the elderly in Nantong, China. *Eye (Lond)* 2008; 22: 1069-1075
  34. Wu M, Yip JLY, Kuper H. Rapid assessment of avoidable blindness in Kunming,

China. *Ophthalmology* 2008;115: 969-974

35. Wang GQ, Bai ZX, Shi J, Luo S, Chang HF, Sai XY. Prevalence and risk factors for eye diseases, blindness, and low vision in Lhasa, Tibet. *Int J Ophthalmol* 2013;6: 237-241
36. Wang H, Zhang Y, Li Z, Wang T, Liu P. Prevalence and causes of corneal blindness. *Clin Experiment Ophthalmol* 2013;42:249-253
37. China - Beijing Eye Study 2001 as it appears in Bourne R, Global Burden of Disease Vision Loss Expert Group. Vision Loss Database - Survey Data on Vision Loss by Severity and Etiology. [Unpublished]
38. Chen H, Wu X, Wei M, et al. Changes in the prevalence of visual impairment due to blinding trachoma in Sichuan province, China: a comparative study between 1987 and 2006. *Ophthalmic Epidemiol* 2012;19:29-37
